# Supplementary material for: A notodontid novelty: Theroa zethus caterpillars use behavior and anti-predator weaponry to disarm host plants
Source: PLoS One. 2019 Jul 10;14(7):e0218994. doi: 10.1371/journal.pone.0218994 (PMC6619741; doi:10.1371/journal.pone.0218994)
Supplement: S1 Data — (XLSX) [file pone.0218994.s001.xlsx]

## Sheet: Sheet1
Experiment 1. Does abrasion reduce acid penetration (Figure 2)?
The wet weight (mg) of latex emitted by severed petioles was measured.
Replicate	VEG abraded	Water abraded	VEG not abraded	Water not abraded
1	0.4	29.2	22.4	20.9
2	0.5	21.2	29.1	23.3
3	0.3	30.8	23.1	28.1
4	0.2	23.6	31.6	27.8
5	0	28.7	25.4	24.8
6	0.1	24.9	22.3	18.1
7	0	20.7	16.8	16.8
8	1.1	21.2	28.4	21
9	2.9	28.2	28.5	31.6
10	0	30.8	37.9	39.6
Experiment 2. Does petiole compression reduce latex exudation (Figure 3)?
After the petiole was severed, the wet weight (mg) of latex emitted by the petiole stub and by the leaf blade was measured.
Petiole data
Replicate	VEG + compression	VEG alone	Compression alone	Neither
1	0	14	10.8	2.14
2	0.7	9.9	8.8	33.5
3	1.8	8.8	19.3	37
4	1.1	3.2	10.1	27.6
5	0.9	9.2	10.9	43.2
6	0.6	6.4	12.8	19.9
7	2	16.6	8.6	26.2
8	0.6	3.2	9.6	21
9	0.2	19.4	14.6	27.2
10	1	10.9	9.2	22.8
Leaf data
Replicate	VEG + compression	VEG alone	Compression alone	Neither
1	16.34	12.48	15.12	15.5
2	15.18	12.91	11.05	16.31
3	12.58	16.9	18.36	14.13
4	13.23	14.4	17.48	12.62
5	11.34	15.78	15.87	15.63
6	11.43	9.83	13.95	15.63
7	15.91	15.41	12.92	16.87
8	10.92	7.42	15.2	14.74
9	13.96	17.92	12.07	12.04
10	12.78	13.62	10.32	16.77
Experiment 3. Does repeated compression reduce latex outflow (Figure 4)?
After the petiole was severed, the wet weight (mg) of latex emitted by the petiole stub and by the leaf blade was measured.
Petiole data
Replicate	Stem to leaf	Leaf to stem	No compression
1	3	8.2	33.6
2	5.3	3.4	25.5
3	4.9	1.9	21.3
4	1.7	7.4	20.1
5	3.5	5.1	31
6	5	3.9	21.7
7	4.4	1.3	15.1
8	2	9.9	17
9	2.8	3.8	16.7
10	3	7.8	32.5
Leaf data
Replicate	Stem to leaf	Leaf to stem	No compression
1	7.38	13.01	18
2	11.41	10.97	14.78
3	9.47	11.34	13.59
4	9.28	15.3	13.62
5	11.49	7.83	17.62
6	8.9	12.86	13.45
7	10.04	11.72	15.33
8	8.62	16.46	17.41
9	8.55	14.7	13.21
10	11.9	15.23	17.05
Experiment 4. Does a reconstituted acid solution reduce latex exudation as effectively as VEG secretion (Figure 5)?
After the petiole was severed, the wet weight (mg) of latex emitted by the petiole stub was measured.
Replicate	VEG	Acid solution	Water
1	1.4	9.6	26.8
2	0.4	6.2	18.3
3	0.6	1.5	26.6
4	0.3	4.3	30.1
5	0.7	6.7	29.4
6	0.2	0.4	20.4
7	0.2	2.1	43
8	0.2	0.4	21.1
9	0.5	0.3	29.1
10	0.4	0	35.2
Experiment 5. Does formic or butyric acid reduce latex exudation (Figure 6)?
After the petiole was severed, the wet weight (mg) of latex emitted by the petiole stub was measured.
Replicate	Formic + butyric	Formic acid	Butyric acid	Water
1	3.7	5.2	24.2	45.6
2	4.7	4.9	22.6	26
3	12	8.8	37	17.5
4	3.2	0.3	21.2	34.6
5	1.2	0.6	29.4	22.3
6	1	5.1	32.4	21.9
7	2.6	10.6	32.6	27.8
8	4.5	5.6	30.8	22.7
9	5	6.4	39.1	35
10	0.4	7.6	40.4	32
Experiment 6. Does VEG secretion or saliva modify cell morphology? (Figure 8)
Replicate	VEG control	VEG girdle	Saliva control	Saliva girdle	Intact control	Intact girdle
1	0.26	0.21	0.44	0.88	0.45	0.78
2	0.26	0.26	0.45	0.67	0.21	0.66
3	0.2	0.44	0.32	0.78	0.35	0.78
Composition of VEG acid measured with HPLC
Formic acid (M)
Replicate	VEG sample 1	VEG sample 2	VEG sample 3
1	7.66	3.84	7.52
2	7.16	5.84	7.21
3	7.31	4.95	7.27
Butyric acid (M)
Replicate	VEG sample 1	VEG sample 2	VEG sample 3
1	0.09	0.02	0.04
2	0.07	0.04	0.05
3	0.09	0.04	0.05
pH of VEG secretion and reconsituted acid solutions
Replicate	VEG sample 1	VEG sample 2	VEG sample 3
1	0.64	1.07	0.97
2	0.82	0.76	0.79
3	0.94	1.05	1.14
Replicate	Acid sample 1	Acid sample 2	Acid sample 3
1	1.14	1.2	1.24
2	0.96	0.98	0.97
3	1.03	1.12	1.15
